# Supplementary material
Source: PubMed Central journal article supplement (PMC9018533)
Supplement: NIHMS1777116-supplement-1.pdf [file NIHMS1777116-supplement-1.pdf]

## Supplementary Information

### Atomic Structure of the *Leishmania* spp. Hsp100 N-Domain

Jonathan M. Mercado<sup>1#</sup>, Sukyeong Lee<sup>2,3#</sup>, Changsoo Chang<sup>4</sup>, Nuri Sung<sup>3</sup>, Lynn Soong<sup>5</sup>,

Andre Catic<sup>1,6</sup>, and Francis T.F. Tsai<sup>1,3,7\*</sup>

<sup>1</sup>Department of Molecular and Cellular Biology, Baylor College of Medicine, Houston, Texas 77030, USA.

<sup>2</sup>Advanced Technology Core for Macromolecular X-ray Crystallography, Baylor College of Medicine, Houston, Texas 77030, USA. <sup>3</sup>Department of Biochemistry and Molecular Biology, Baylor College of Medicine, Houston, TX 77030, USA. <sup>4</sup>Structural Biology Center, Biosciences Division, Argonne National Laboratory, Argonne, IL 60439, USA. <sup>5</sup>Department of Microbiology and Immunology, University of Texas Medical Branch, Galveston, TX 77555, USA. <sup>6</sup>Huffington Center on Aging, Baylor College of Medicine, Houston, Texas 77030, USA. <sup>7</sup>Department of Molecular Virology and Microbiology, Baylor College of Medicine, Houston, Texas 77030, USA.

#J.M.M. and S.L. should be considered joint first author.

\*Corresponding author (ftsai@bcm.edu).

Fig. S1

A

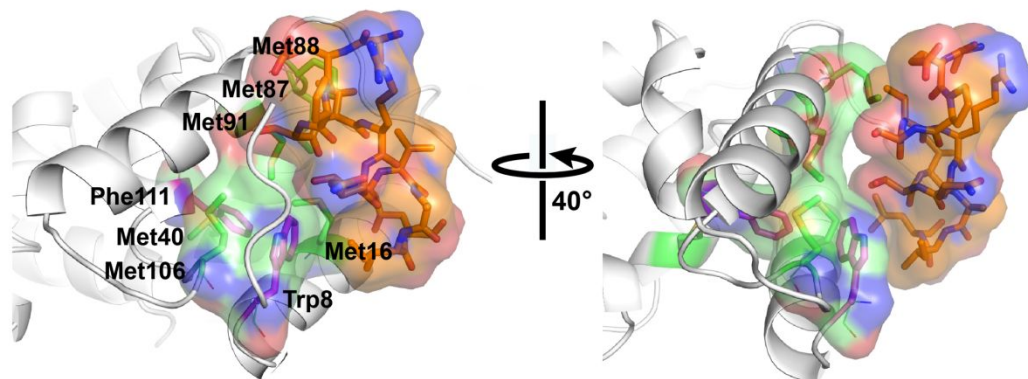

B

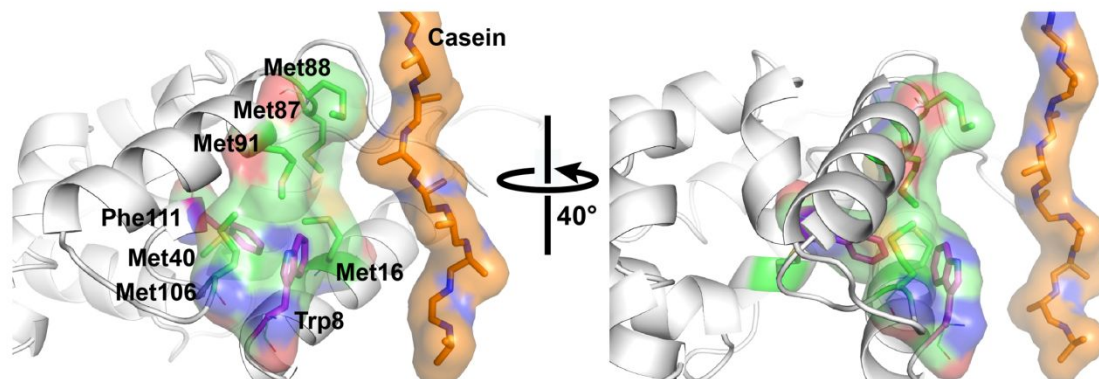

**Figure S1:** Model of a putative *LmHsp100<sub>N</sub>*-substrate complex. Key residues are labelled and depicted as stick models and surface rendering. **(A)** Superposition of *LmHsp100<sub>N</sub>* onto the crystal structure of yeast Hsp104<sub>N</sub> bound to the C-terminal helix of a neighboring N-domain (PDB: 6AMN)<sup>1</sup>. The C-terminal helix (residues 341-352) of sequence AEPSVRQTVAIL (orange), which mimics a substrate peptide<sup>1</sup>, is depicted as stick model and surface representation. The figure highlights the putative interface between the N-domain and substrate. **(B)** Model of *LmHsp100<sub>N</sub>* bound to casein, an Hsp100 model substrate, depicted as poly-alanine (gold). *LmHsp100<sub>N</sub>* was superposed onto the 3D structure of the N-domain of an *E. coli* ClpB hexamer bound to casein (PDB: 6OG3\_C)<sup>2</sup>. The casein side-chains were not resolved in the cryoEM reconstruction with casein represented as a poly-alanine model<sup>2</sup>.

## References

1. Lee J, Sung N, Mercado JM, et al. Overlapping and specific functions of the Hsp104 N domain define its role in protein disaggregation. *Sci Rep.* 2017;7:11184.
2. Rizo AN, Lin J, Gates SN, et al. Structural basis for substrate gripping and translocation by the ClpB AAA+ disaggregase. *Nat Commun.* 2019;10(1):2393.
